# Supplementary material
Source: MDPI journal article supplement (https://www.mdpi.com/2304-6740/11/10/412)
Supplement: s1 [file s1]

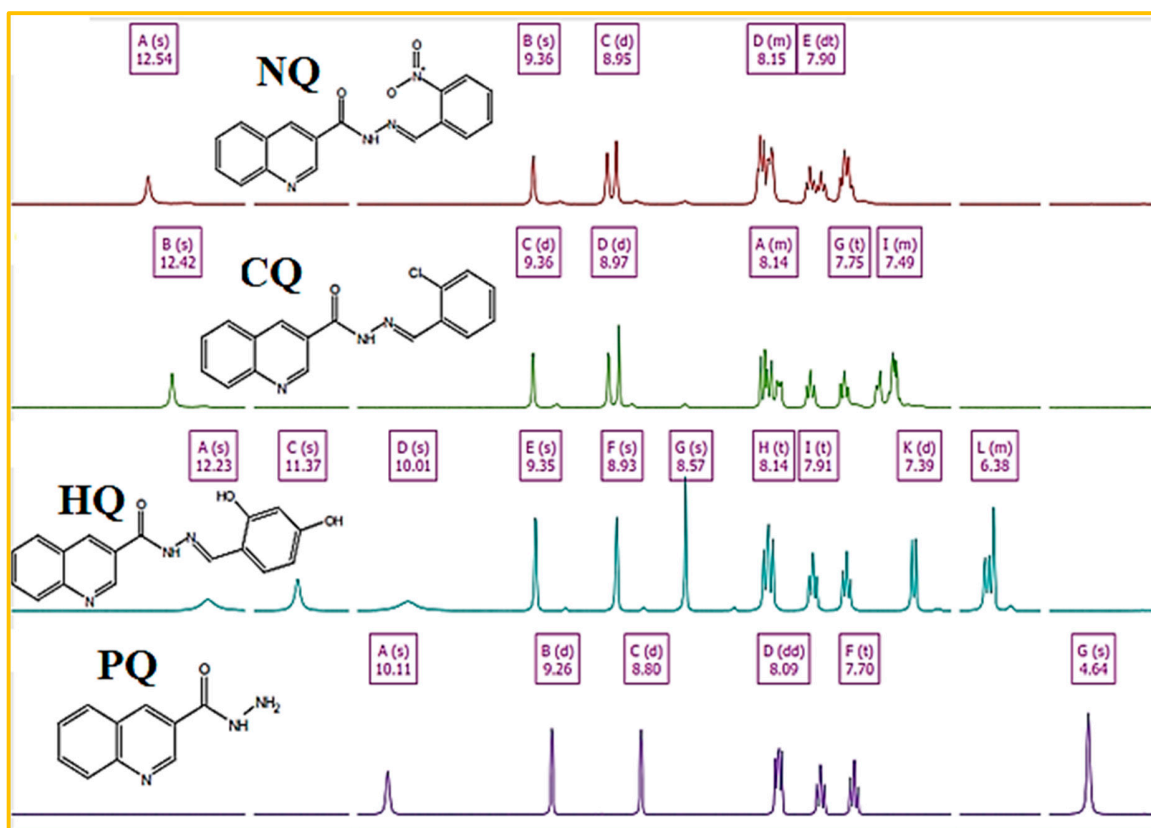

Figure S1. Comparison of the  $^1\text{H}$ -NMR spectra of NQ, CQ and HQ Ligands with the amine (quinoline-3-carbohydrazide, PQ).



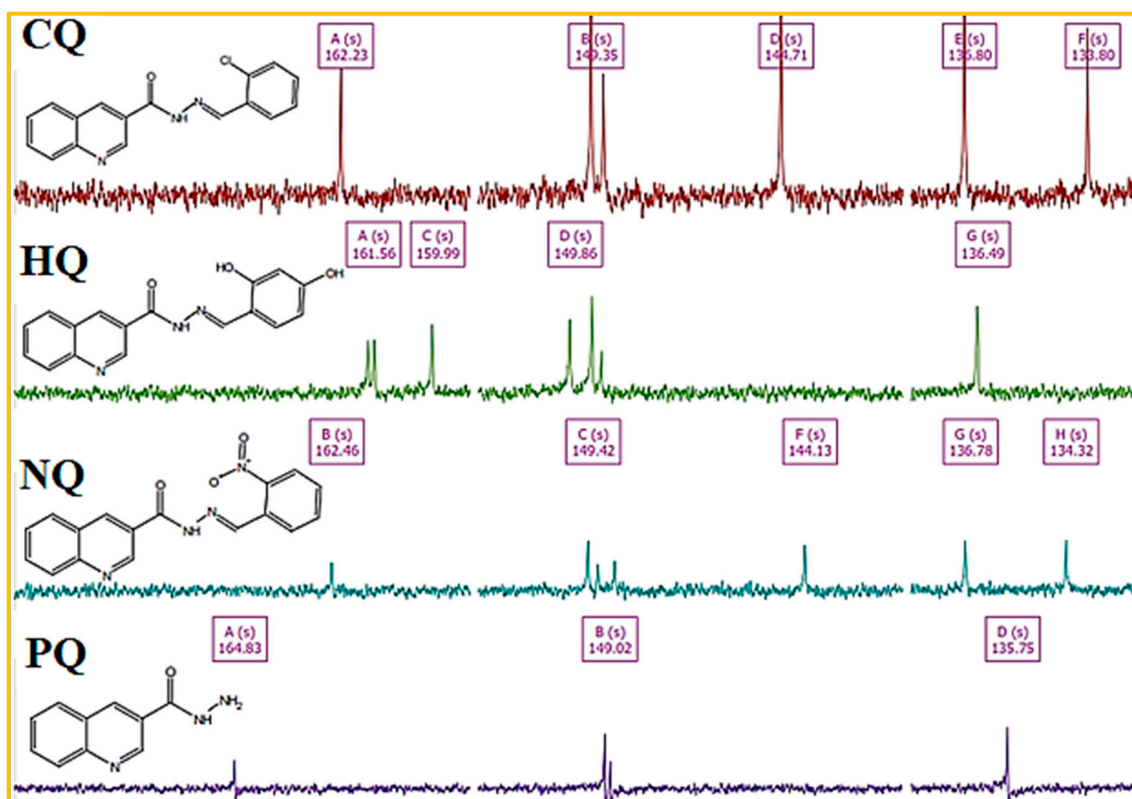

Figure S2. Comparison of the  $^{13}\text{C}$ -NMR spectra of NQ, CQ and HQ Ligands with the amine (quinoline-3-carbohydrazide, PQ)



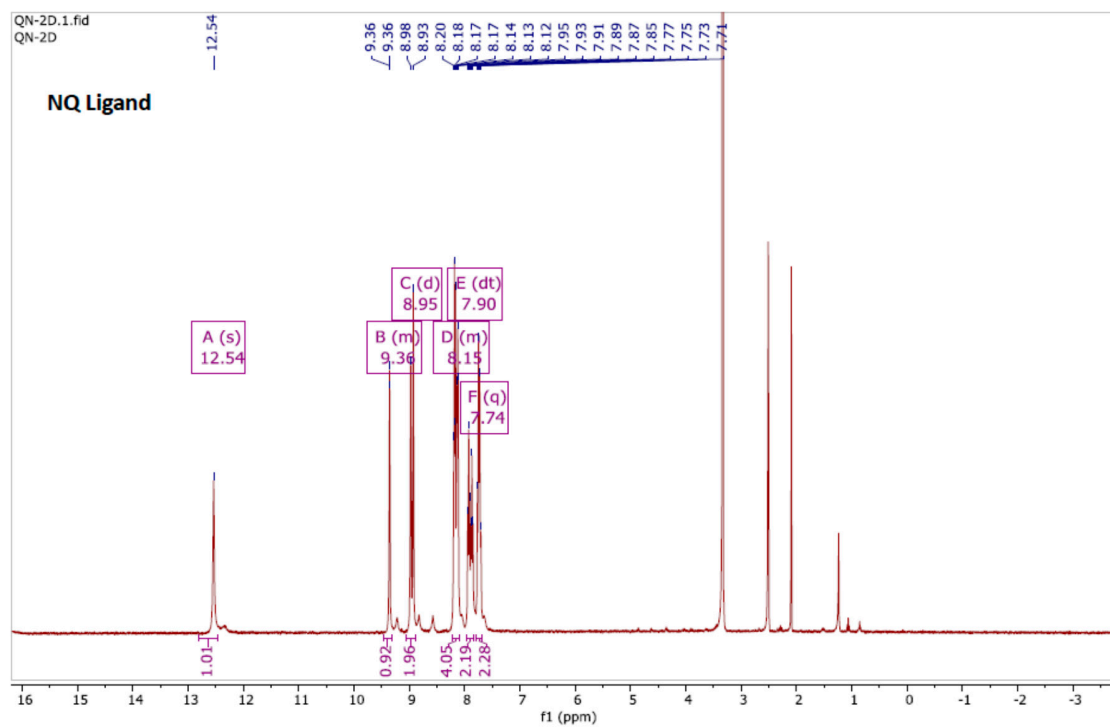

Figure S3.  $^1\text{H}$ -NMR spectrum of NQ ligand.



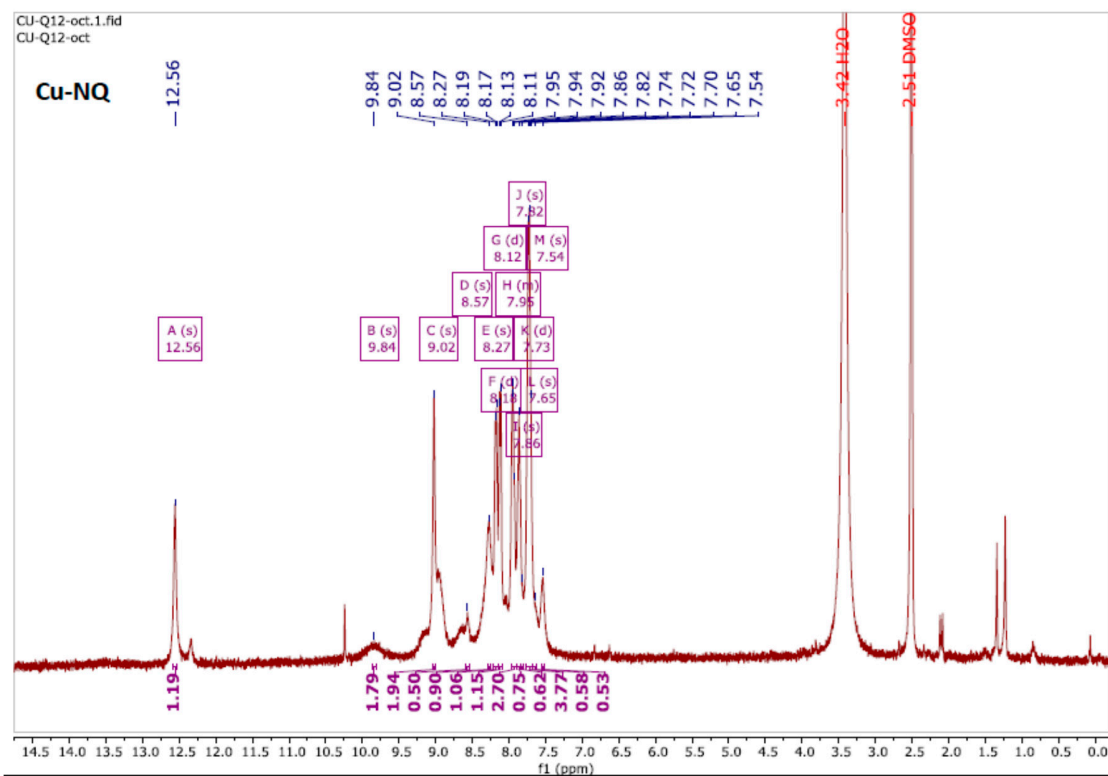

Figure S4.  $^1\text{H}$ -NMR spectrum of Cu-NQ complex.



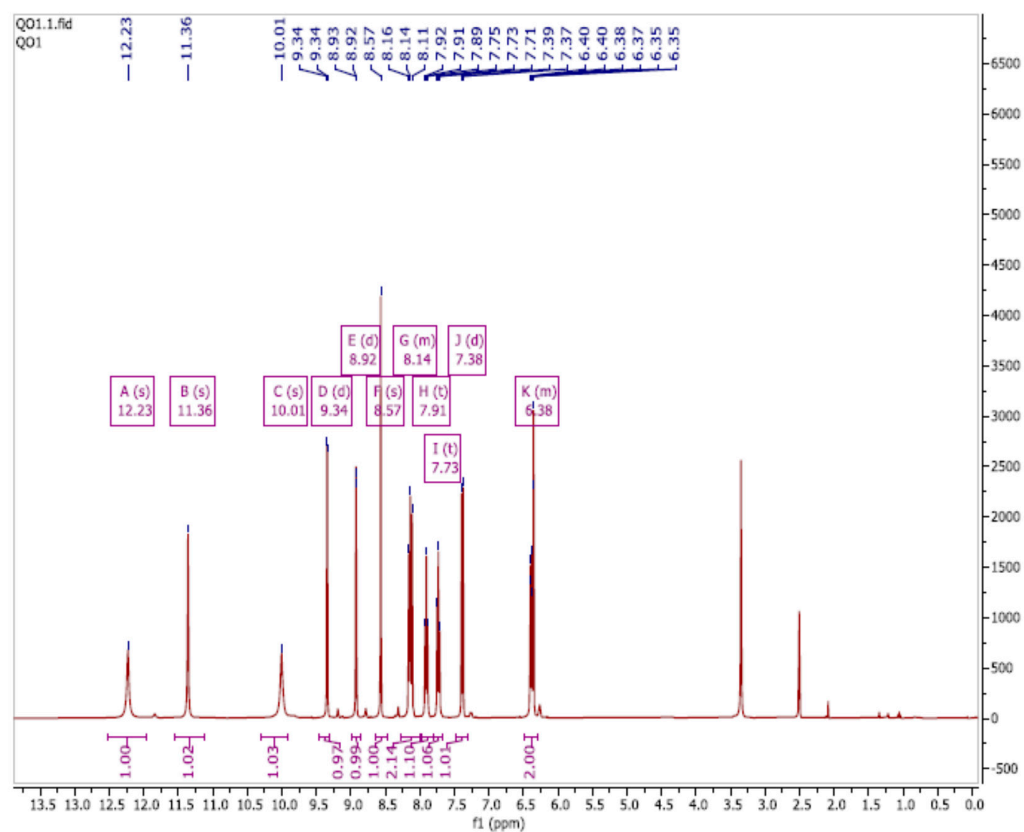

Figure S5.  $^1\text{H}$ -NMR spectrum of HQ ligand.



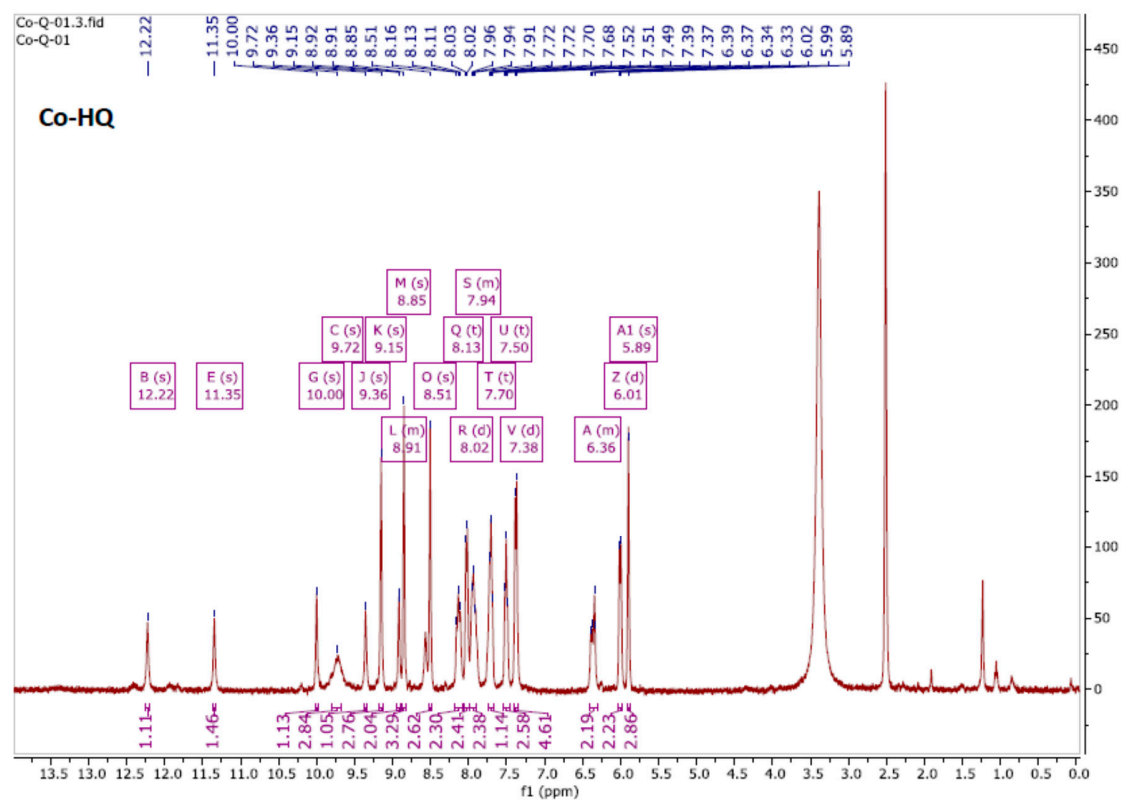

Figure S6.  $^1\text{H}$ -NMR spectrum of Co-HQ complex.



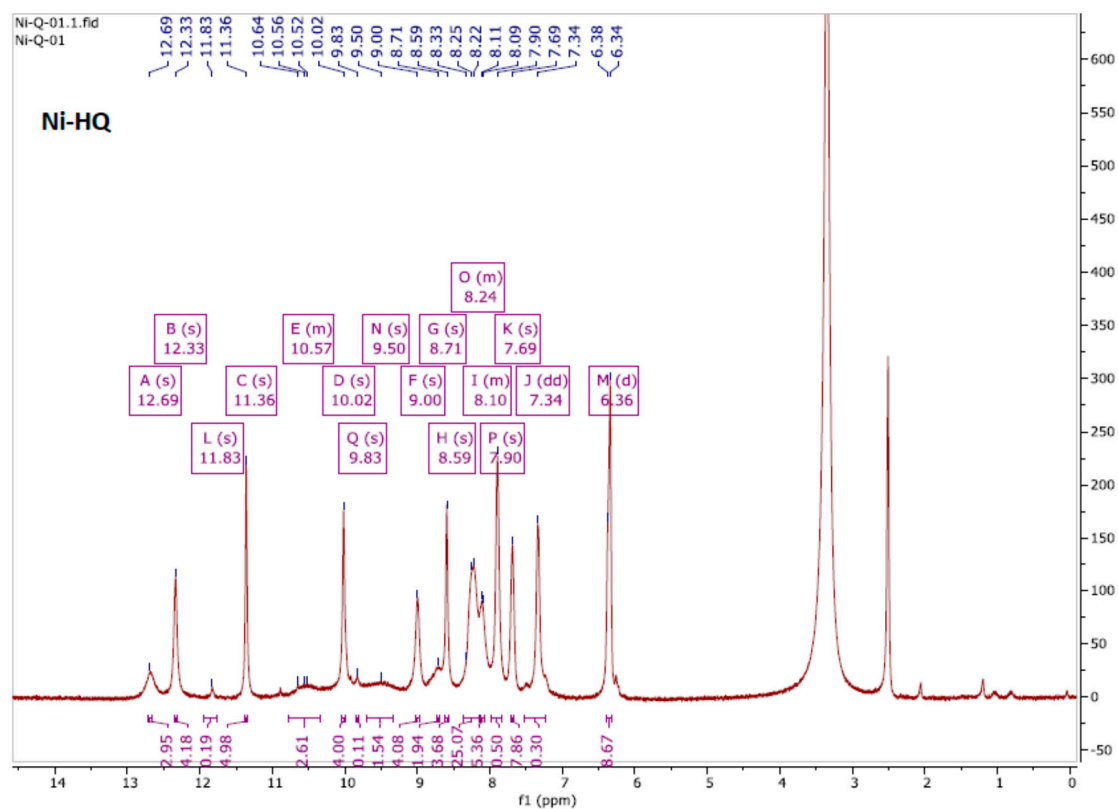

Figure S7.  $^1\text{H}$ -NMR spectrum of Ni-HQ complex.



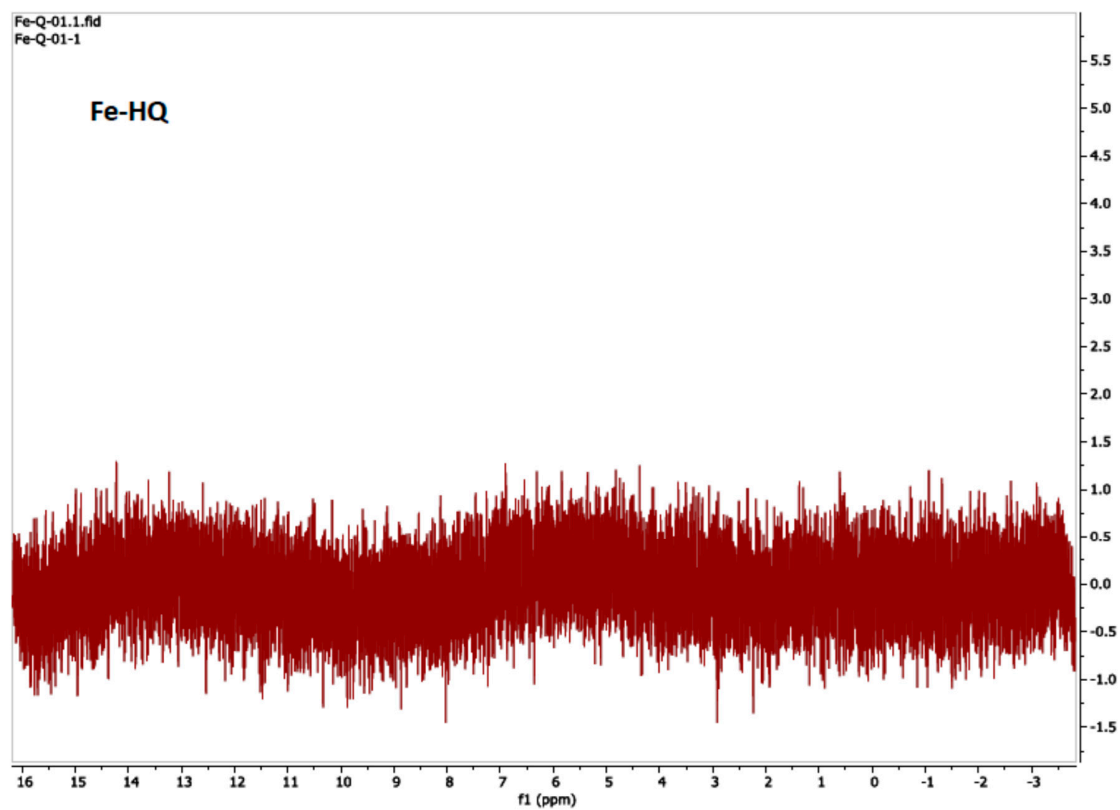

Figure S8.  $^1\text{H}$ -NMR spectrum of Fe-HQ complex.



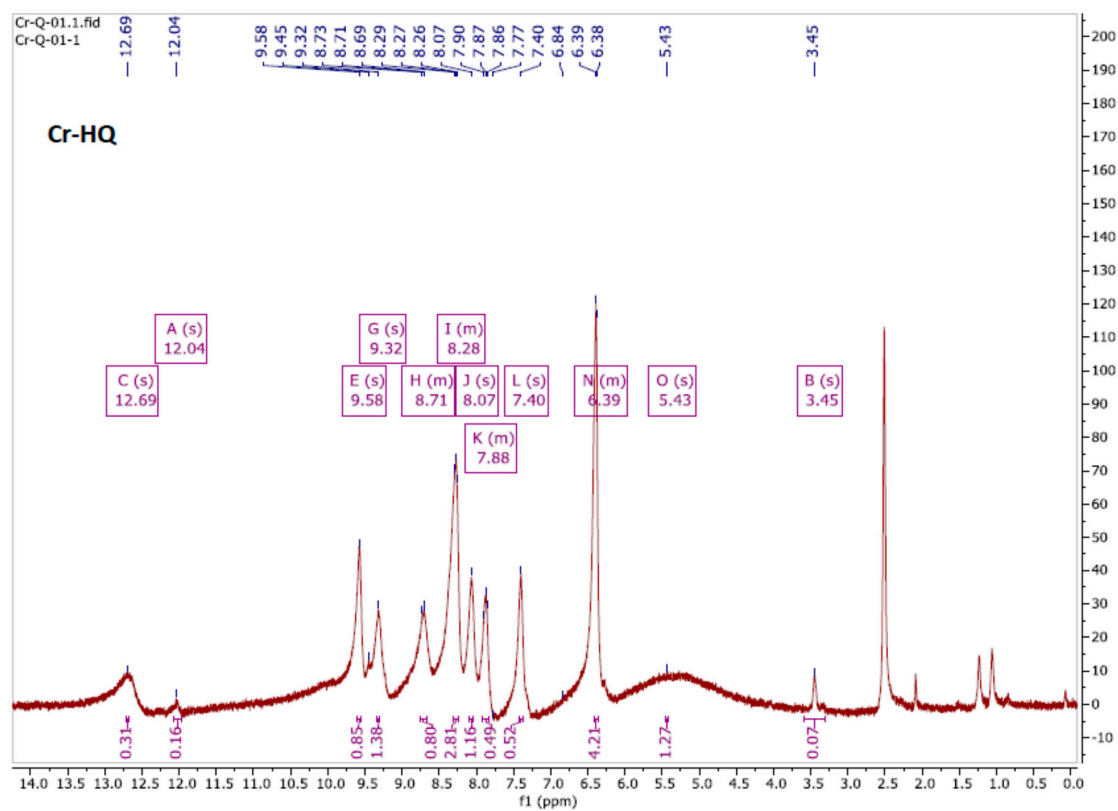

Figure S9.  $^1\text{H}$ -NMR spectrum of Cr-HQ complex.



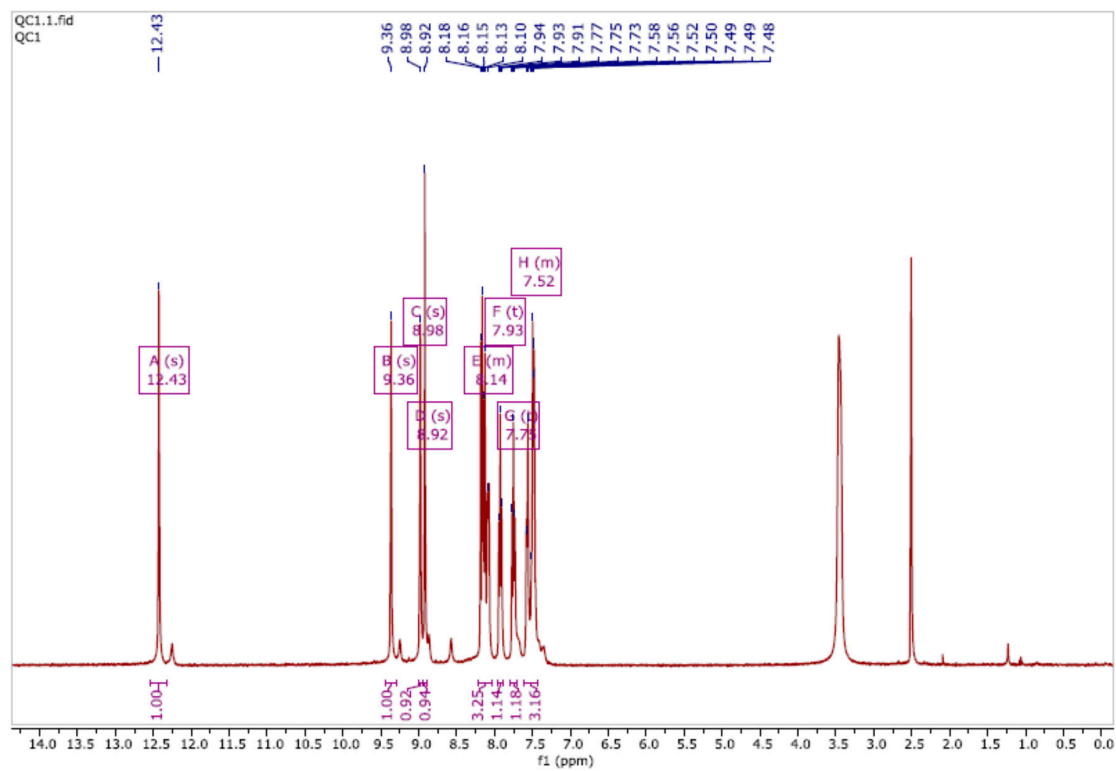

Figure S10.  $^1\text{H}$ -NMR spectrum of CQ ligand.



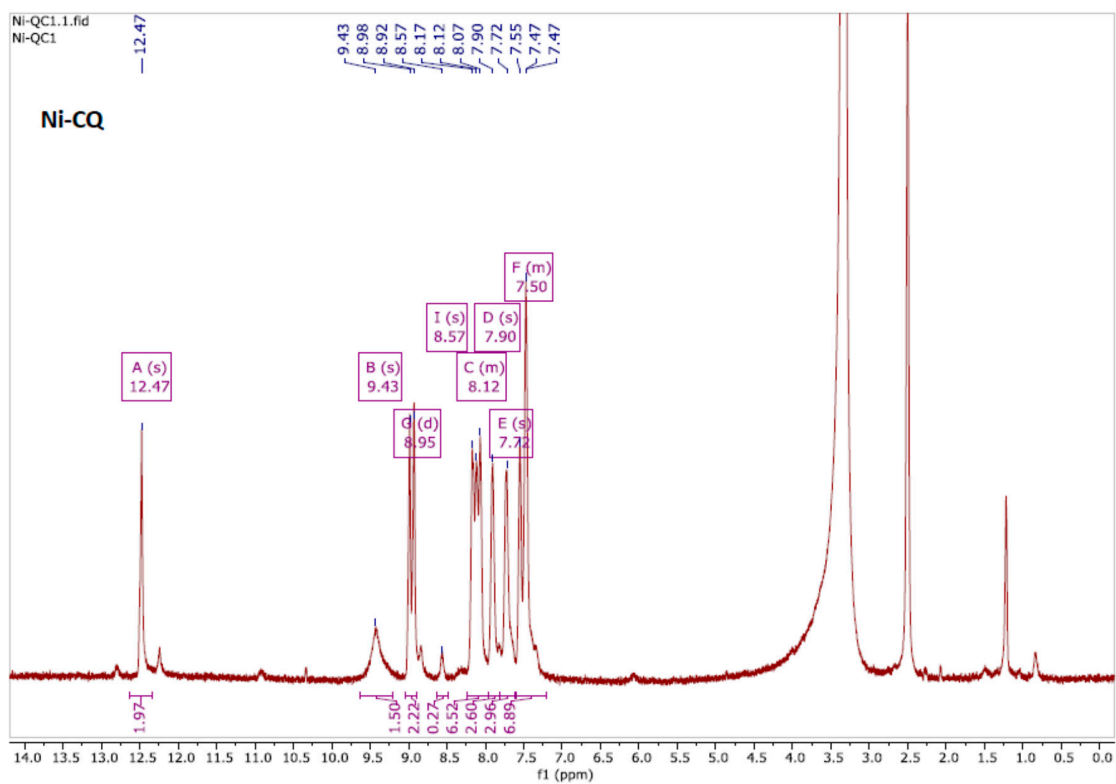

Figure S11.  $^1\text{H}$ -NMR spectrum of Ni-CQ complex.



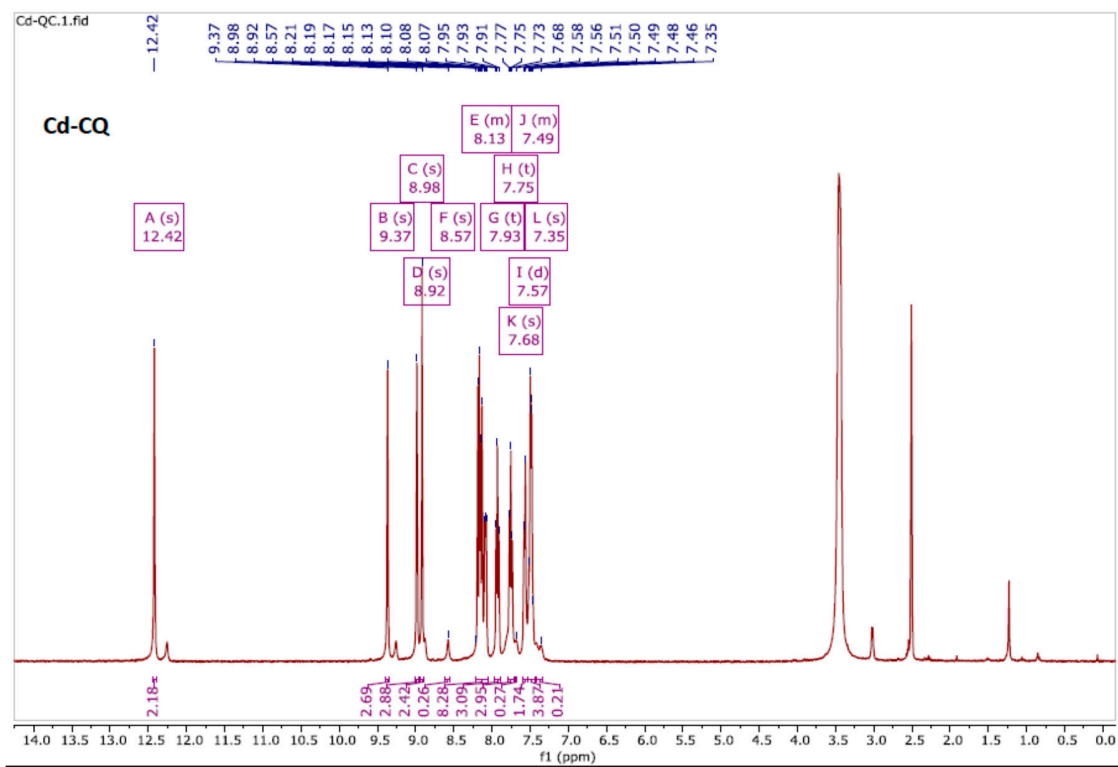

Figure S12.  $^1\text{H}$ -NMR spectrum of Cd-CQ complex.



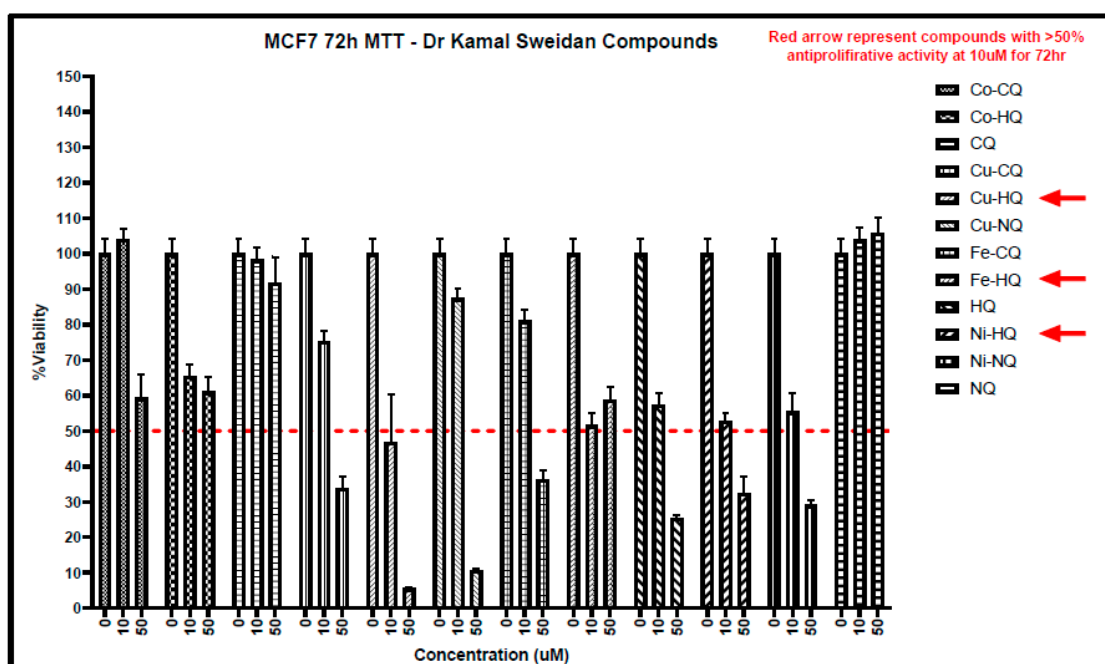

Figure S13. The 50% inhibitory concentration (IC<sub>50</sub>) values for tested compounds treatment in MCF7 cell lines. Experiments were carried out for 72 hours treatment duration. Experiments were run in triplicates for at least three independent trials (n=6). Concentrations are expressed in micromolar. NA: not applicable; SD: standard deviation; h: hour;  $\mu$ M: micromolar.



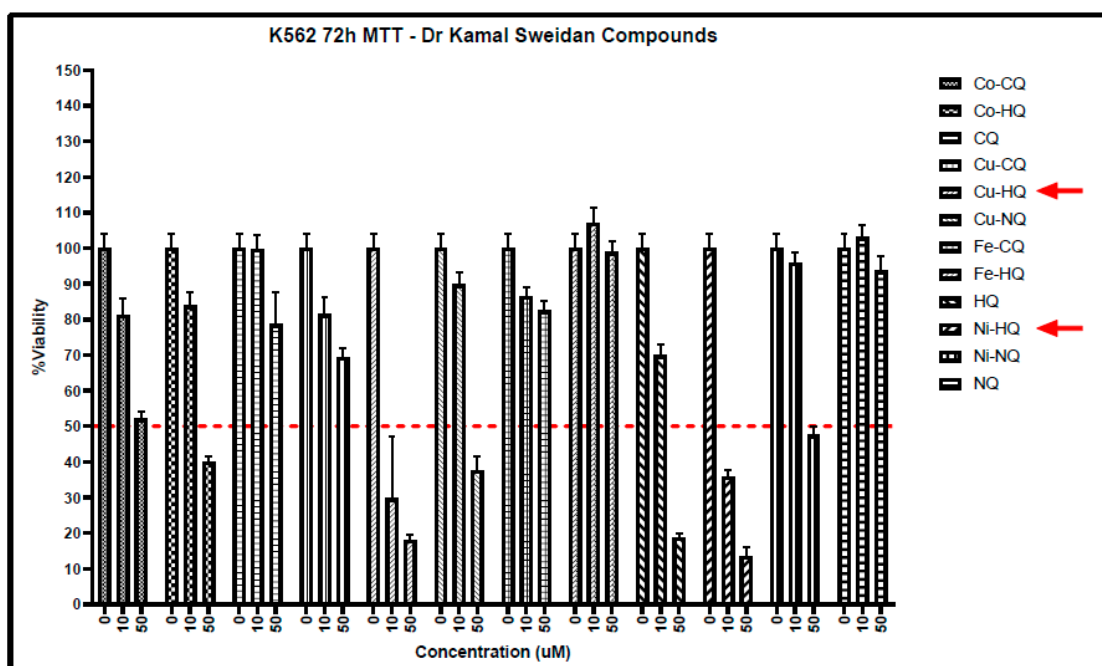

Figure S14. The 50% inhibitory concentration (IC<sub>50</sub>) values for tested compounds treatment in K562 cell lines. Experiments were carried out for 72 hours treatment duration. Experiments were run in triplicates for at least three independent trials (n=6). Concentrations are expressed in micromolar. NA: not applicable; SD: standard deviation; h: hour;  $\mu$ M: micromolar.



Table S1. Crystal data and structure refinement for CQ·H<sub>2</sub>O.

|                                   |                                                                 |          |
|-----------------------------------|-----------------------------------------------------------------|----------|
| Identification code               | 2112coqc                                                        |          |
| Empirical formula                 | C <sub>17</sub> H <sub>14</sub> ClN <sub>3</sub> O <sub>2</sub> |          |
| Formula weight                    | 327.76                                                          |          |
| Temperature                       | 190(2) K                                                        |          |
| Wavelength                        | 1.54184 Å                                                       |          |
| Crystal system                    | Orthorhombic                                                    |          |
| Space group                       | <i>Pbca</i>                                                     |          |
| Unit cell dimensions              | a = 12.7287(6) Å                                                | α = 90°. |
|                                   | b = 12.9558(5) Å                                                | β = 90°. |
|                                   | c = 18.8331(12) Å                                               | γ = 90°. |
| Volume                            | 3105.8(3) Å <sup>3</sup>                                        |          |
| Z                                 | 8                                                               |          |
| Density (calculated)              | 1.402 Mg/m <sup>3</sup>                                         |          |
| Absorption coefficient            | 2.294 mm <sup>-1</sup>                                          |          |
| F(000)                            | 1360                                                            |          |
| Crystal size                      | 0.300 x 0.200 x 0.100 mm <sup>3</sup>                           |          |
| Theta range for data collection   | 4.696 to 61.648°.                                               |          |
| Index ranges                      | -14 ≤ h ≤ 13, -13 ≤ k ≤ 14, -21 ≤ l ≤ 21                        |          |
| Reflections collected             | 8638                                                            |          |
| Independent reflections           | 2409 [R(int) = 0.0536]                                          |          |
| Completeness to theta = 61.648°   | 99.5 %                                                          |          |
| Absorption correction             | Semi-empirical from equivalents                                 |          |
| Max. and min. transmission        | 1 and 0.899                                                     |          |
| Refinement method                 | Full-matrix least-squares on F <sup>2</sup>                     |          |
| Data / restraints / parameters    | 2409 / 0 / 209                                                  |          |
| Goodness-of-fit on F <sup>2</sup> | 1.090                                                           |          |
| Final R indices [I > 2σ(I)]       | R1 = 0.0495, wR2 = 0.1271                                       |          |
| R indices (all data)              | R1 = 0.0659, wR2 = 0.1383                                       |          |
| Extinction coefficient            | n/a                                                             |          |
| Largest diff. peak and hole       | 0.381 and -0.361 e.Å <sup>-3</sup>                              |          |



Table S2. Bond lengths [Å] and angles [°] for CQ·H<sub>2</sub>O.

|                 |          |
|-----------------|----------|
| C(1)-N(1)       | 1.316(4) |
| C(1)-C(2)       | 1.422(4) |
| C(2)-C(3)       | 1.371(4) |
| C(2)-C(10)      | 1.492(4) |
| C(3)-C(4)       | 1.410(4) |
| C(4)-C(9)       | 1.406(4) |
| C(4)-C(5)       | 1.425(4) |
| C(5)-C(6)       | 1.364(4) |
| C(6)-C(7)       | 1.407(5) |
| C(7)-C(8)       | 1.363(5) |
| C(8)-C(9)       | 1.421(4) |
| C(9)-N(1)       | 1.379(4) |
| C(10)-O(1)      | 1.230(3) |
| C(10)-N(2)      | 1.350(4) |
| C(11)-N(3)      | 1.276(4) |
| C(11)-C(12)     | 1.466(4) |
| C(12)-C(13)     | 1.391(4) |
| C(12)-C(17)     | 1.402(4) |
| C(13)-C(14)     | 1.385(5) |
| C(13)-Cl(1)     | 1.747(3) |
| C(14)-C(15)     | 1.379(5) |
| C(15)-C(16)     | 1.386(5) |
| C(16)-C(17)     | 1.372(5) |
| N(2)-N(3)       | 1.378(3) |
|                 |          |
| N(1)-C(1)-C(2)  | 123.9(3) |
| C(3)-C(2)-C(1)  | 117.8(3) |
| C(3)-C(2)-C(10) | 117.9(2) |
| C(1)-C(2)-C(10) | 124.2(2) |
| C(2)-C(3)-C(4)  | 120.1(3) |
| C(9)-C(4)-C(3)  | 118.2(2) |
| C(9)-C(4)-C(5)  | 118.8(3) |
| C(3)-C(4)-C(5)  | 123.0(3) |
| C(6)-C(5)-C(4)  | 120.3(3) |



|                   |          |
|-------------------|----------|
| C(5)-C(6)-C(7)    | 120.3(3) |
| C(8)-C(7)-C(6)    | 121.1(3) |
| C(7)-C(8)-C(9)    | 119.6(3) |
| N(1)-C(9)-C(4)    | 121.8(3) |
| N(1)-C(9)-C(8)    | 118.4(3) |
| C(4)-C(9)-C(8)    | 119.8(3) |
| O(1)-C(10)-N(2)   | 122.1(3) |
| O(1)-C(10)-C(2)   | 120.5(2) |
| N(2)-C(10)-C(2)   | 117.4(2) |
| N(3)-C(11)-C(12)  | 119.3(3) |
| C(13)-C(12)-C(17) | 117.2(3) |
| C(13)-C(12)-C(11) | 121.8(3) |
| C(17)-C(12)-C(11) | 121.1(3) |
| C(14)-C(13)-C(12) | 122.1(3) |
| C(14)-C(13)-Cl(1) | 117.4(3) |
| C(12)-C(13)-Cl(1) | 120.4(2) |
| C(15)-C(14)-C(13) | 119.0(3) |
| C(14)-C(15)-C(16) | 120.3(3) |
| C(17)-C(16)-C(15) | 120.1(3) |
| C(16)-C(17)-C(12) | 121.3(3) |
| C(1)-N(1)-C(9)    | 118.2(2) |
| C(10)-N(2)-N(3)   | 118.0(2) |
| C(11)-N(3)-N(2)   | 115.9(2) |

---



Table S3. Torsion angles [°] for CQ·H<sub>2</sub>O.

---

|                         |           |
|-------------------------|-----------|
| N(1)-C(1)-C(2)-C(3)     | 1.0(4)    |
| N(1)-C(1)-C(2)-C(10)    | -178.2(3) |
| C(1)-C(2)-C(3)-C(4)     | -0.9(4)   |
| C(10)-C(2)-C(3)-C(4)    | 178.3(2)  |
| C(2)-C(3)-C(4)-C(9)     | 0.2(4)    |
| C(2)-C(3)-C(4)-C(5)     | -179.4(3) |
| C(9)-C(4)-C(5)-C(6)     | -0.2(4)   |
| C(3)-C(4)-C(5)-C(6)     | 179.5(3)  |
| C(4)-C(5)-C(6)-C(7)     | 0.1(5)    |
| C(5)-C(6)-C(7)-C(8)     | 0.1(5)    |
| C(6)-C(7)-C(8)-C(9)     | -0.2(5)   |
| C(3)-C(4)-C(9)-N(1)     | 0.5(4)    |
| C(5)-C(4)-C(9)-N(1)     | -179.8(3) |
| C(3)-C(4)-C(9)-C(8)     | -179.6(3) |
| C(5)-C(4)-C(9)-C(8)     | 0.1(4)    |
| C(7)-C(8)-C(9)-N(1)     | -180.0(3) |
| C(7)-C(8)-C(9)-C(4)     | 0.1(4)    |
| C(3)-C(2)-C(10)-O(1)    | -6.0(4)   |
| C(1)-C(2)-C(10)-O(1)    | 173.2(3)  |
| C(3)-C(2)-C(10)-N(2)    | 174.4(2)  |
| C(1)-C(2)-C(10)-N(2)    | -6.5(4)   |
| N(3)-C(11)-C(12)-C(13)  | 175.7(3)  |
| N(3)-C(11)-C(12)-C(17)  | -5.0(4)   |
| C(17)-C(12)-C(13)-C(14) | -0.1(4)   |
| C(11)-C(12)-C(13)-C(14) | 179.3(3)  |
| C(17)-C(12)-C(13)-Cl(1) | 179.1(2)  |
| C(11)-C(12)-C(13)-Cl(1) | -1.5(4)   |
| C(12)-C(13)-C(14)-C(15) | 0.2(5)    |
| Cl(1)-C(13)-C(14)-C(15) | -179.1(3) |
| C(13)-C(14)-C(15)-C(16) | 0.2(5)    |
| C(14)-C(15)-C(16)-C(17) | -0.6(5)   |
| C(15)-C(16)-C(17)-C(12) | 0.6(5)    |
| C(13)-C(12)-C(17)-C(16) | -0.3(5)   |
| C(11)-C(12)-C(17)-C(16) | -179.7(3) |



|                       |           |
|-----------------------|-----------|
| C(2)-C(1)-N(1)-C(9)   | -0.3(4)   |
| C(4)-C(9)-N(1)-C(1)   | -0.5(4)   |
| C(8)-C(9)-N(1)-C(1)   | 179.6(3)  |
| O(1)-C(10)-N(2)-N(3)  | 1.2(4)    |
| C(2)-C(10)-N(2)-N(3)  | -179.2(2) |
| C(12)-C(11)-N(3)-N(2) | 179.9(2)  |
| C(10)-N(2)-N(3)-C(11) | 177.8(3)  |

---



Table S4. Hydrogen bonds for CQ·H<sub>2</sub>O [Å and °].

| D-H...A             | d(D-H) | d(H...A) | d(D...A) | <(DHA) |
|---------------------|--------|----------|----------|--------|
| C(1)-H(1)...O(2)    | 0.95   | 2.42     | 3.356(4) | 168.8  |
| C(11)-H(11)...O(2)  | 0.95   | 2.49     | 3.284(4) | 141.2  |
| N(2)-H(2)...O(2)    | 0.88   | 2.03     | 2.877(3) | 162.1  |
| O(2)-H(2A)...O(1)#1 | 0.81   | 2.08     | 2.862(3) | 162.8  |
| O(2)-H(2B)...N(1)#2 | 0.81   | 2.06     | 2.846(3) | 166.6  |

Symmetry transformations used to generate equivalent atoms:

#1  $x-1/2, -y+3/2, -z+1$  #2  $-x+1, -y+1, -z+1$



Table S5. Crystal data and structure refinement for NQ·H<sub>2</sub>O.

|                                                     |                                                               |                         |
|-----------------------------------------------------|---------------------------------------------------------------|-------------------------|
| Identification code                                 | 2110niqn                                                      |                         |
| Empirical formula                                   | C <sub>17</sub> H <sub>14</sub> N <sub>4</sub> O <sub>4</sub> |                         |
| Formula weight                                      | 338.32                                                        |                         |
| Temperature                                         | 190(2) K                                                      |                         |
| Wavelength                                          | 0.71073 Å                                                     |                         |
| Crystal system                                      | Monoclinic                                                    |                         |
| Space group                                         | <i>P</i> 2 <sub>1</sub> / <i>c</i>                            |                         |
| Unit cell dimensions                                | <i>a</i> = 9.7148(13) Å                                       | $\alpha$ = 90°.         |
|                                                     | <i>b</i> = 12.6343(18) Å                                      | $\beta$ = 101.402(13)°. |
|                                                     | <i>c</i> = 12.9992(14) Å                                      | $\gamma$ = 90°.         |
| Volume                                              | 1564.0(4) Å <sup>3</sup>                                      |                         |
| <i>Z</i>                                            | 4                                                             |                         |
| Density (calculated)                                | 1.437 Mg/m <sup>3</sup>                                       |                         |
| Absorption coefficient                              | 0.106 mm <sup>-1</sup>                                        |                         |
| <i>F</i> (000)                                      | 704                                                           |                         |
| Crystal size                                        | 0.400 x 0.200 x 0.030 mm <sup>3</sup>                         |                         |
| Theta range for data collection                     | 3.329 to 25.000°.                                             |                         |
| Index ranges                                        | -11 ≤ <i>h</i> ≤ 11, -15 ≤ <i>k</i> ≤ 12, -10 ≤ <i>l</i> ≤ 15 |                         |
| Reflections collected                               | 6436                                                          |                         |
| Independent reflections                             | 2750 [ <i>R</i> (int) = 0.0471]                               |                         |
| Completeness to theta = 25.000°                     | 99.8 %                                                        |                         |
| Refinement method                                   | Full-matrix least-squares on <i>F</i> <sup>2</sup>            |                         |
| Data / restraints / parameters                      | 2750 / 0 / 226                                                |                         |
| Goodness-of-fit on <i>F</i> <sup>2</sup>            | 1.121                                                         |                         |
| Final <i>R</i> indices [ <i>I</i> > 2σ( <i>I</i> )] | <i>R</i> 1 = 0.0649, <i>wR</i> 2 = 0.1114                     |                         |
| <i>R</i> indices (all data)                         | <i>R</i> 1 = 0.1059, <i>wR</i> 2 = 0.1267                     |                         |
| Extinction coefficient                              | n/a                                                           |                         |
| Largest diff. peak and hole                         | 0.219 and -0.214 e.Å <sup>-3</sup>                            |                         |



Table S6. Bond lengths [Å] and angles [°] for NQ·H<sub>2</sub>O.

|                 |          |
|-----------------|----------|
| C(1)-N(1)       | 1.323(3) |
| C(1)-C(2)       | 1.413(4) |
| C(2)-C(3)       | 1.364(4) |
| C(2)-C(10)      | 1.502(3) |
| C(3)-C(4)       | 1.411(3) |
| C(4)-C(9)       | 1.412(4) |
| C(4)-C(5)       | 1.418(4) |
| C(5)-C(6)       | 1.372(4) |
| C(6)-C(7)       | 1.396(4) |
| C(7)-C(8)       | 1.364(4) |
| C(8)-C(9)       | 1.415(3) |
| C(9)-N(1)       | 1.379(3) |
| C(10)-O(1)      | 1.232(3) |
| C(10)-N(2)      | 1.354(3) |
| C(11)-N(3)      | 1.277(3) |
| C(11)-C(12)     | 1.475(3) |
| C(12)-C(17)     | 1.393(4) |
| C(12)-C(13)     | 1.395(4) |
| C(13)-C(14)     | 1.382(4) |
| C(13)-N(4)      | 1.472(4) |
| C(14)-C(15)     | 1.372(5) |
| C(15)-C(16)     | 1.384(4) |
| C(16)-C(17)     | 1.380(4) |
| N(2)-N(3)       | 1.386(3) |
| N(4)-O(3)       | 1.226(3) |
| N(4)-O(2)       | 1.238(3) |
|                 |          |
| N(1)-C(1)-C(2)  | 123.7(3) |
| C(3)-C(2)-C(1)  | 118.6(2) |
| C(3)-C(2)-C(10) | 117.7(3) |
| C(1)-C(2)-C(10) | 123.8(2) |
| C(2)-C(3)-C(4)  | 120.1(3) |
| C(3)-C(4)-C(9)  | 117.6(2) |
| C(3)-C(4)-C(5)  | 123.2(3) |



|                   |          |
|-------------------|----------|
| C(9)-C(4)-C(5)    | 119.2(2) |
| C(6)-C(5)-C(4)    | 119.6(3) |
| C(5)-C(6)-C(7)    | 120.9(3) |
| C(8)-C(7)-C(6)    | 121.0(3) |
| C(7)-C(8)-C(9)    | 119.7(3) |
| N(1)-C(9)-C(4)    | 122.2(2) |
| N(1)-C(9)-C(8)    | 118.2(3) |
| C(4)-C(9)-C(8)    | 119.6(3) |
| O(1)-C(10)-N(2)   | 122.6(2) |
| O(1)-C(10)-C(2)   | 120.4(3) |
| N(2)-C(10)-C(2)   | 117.0(3) |
| N(3)-C(11)-C(12)  | 118.8(3) |
| C(17)-C(12)-C(13) | 116.3(2) |
| C(17)-C(12)-C(11) | 120.6(3) |
| C(13)-C(12)-C(11) | 123.1(3) |
| C(14)-C(13)-C(12) | 123.1(3) |
| C(14)-C(13)-N(4)  | 116.1(3) |
| C(12)-C(13)-N(4)  | 120.7(2) |
| C(15)-C(14)-C(13) | 118.5(3) |
| C(14)-C(15)-C(16) | 120.6(3) |
| C(17)-C(16)-C(15) | 119.9(3) |
| C(16)-C(17)-C(12) | 121.6(3) |
| C(1)-N(1)-C(9)    | 117.8(3) |
| C(10)-N(2)-N(3)   | 117.8(2) |
| C(11)-N(3)-N(2)   | 114.5(2) |
| O(3)-N(4)-O(2)    | 123.7(3) |
| O(3)-N(4)-C(13)   | 118.6(2) |
| O(2)-N(4)-C(13)   | 117.6(2) |

---



Table S7. Torsion angles [°] for NQ·H<sub>2</sub>O.

---

|                         |           |
|-------------------------|-----------|
| N(1)-C(1)-C(2)-C(3)     | -0.6(4)   |
| N(1)-C(1)-C(2)-C(10)    | 179.2(2)  |
| C(1)-C(2)-C(3)-C(4)     | 0.7(4)    |
| C(10)-C(2)-C(3)-C(4)    | -179.1(2) |
| C(2)-C(3)-C(4)-C(9)     | -0.3(4)   |
| C(2)-C(3)-C(4)-C(5)     | -179.1(2) |
| C(3)-C(4)-C(5)-C(6)     | 179.3(2)  |
| C(9)-C(4)-C(5)-C(6)     | 0.5(4)    |
| C(4)-C(5)-C(6)-C(7)     | 0.6(4)    |
| C(5)-C(6)-C(7)-C(8)     | -0.7(4)   |
| C(6)-C(7)-C(8)-C(9)     | -0.4(4)   |
| C(3)-C(4)-C(9)-N(1)     | -0.4(4)   |
| C(5)-C(4)-C(9)-N(1)     | 178.5(2)  |
| C(3)-C(4)-C(9)-C(8)     | 179.6(2)  |
| C(5)-C(4)-C(9)-C(8)     | -1.6(4)   |
| C(7)-C(8)-C(9)-N(1)     | -178.5(2) |
| C(7)-C(8)-C(9)-C(4)     | 1.5(4)    |
| C(3)-C(2)-C(10)-O(1)    | 4.8(4)    |
| C(1)-C(2)-C(10)-O(1)    | -175.0(3) |
| C(3)-C(2)-C(10)-N(2)    | -175.0(2) |
| C(1)-C(2)-C(10)-N(2)    | 5.2(4)    |
| N(3)-C(11)-C(12)-C(17)  | 16.5(4)   |
| N(3)-C(11)-C(12)-C(13)  | -166.2(2) |
| C(17)-C(12)-C(13)-C(14) | 2.5(4)    |
| C(11)-C(12)-C(13)-C(14) | -174.9(3) |
| C(17)-C(12)-C(13)-N(4)  | -175.0(2) |
| C(11)-C(12)-C(13)-N(4)  | 7.6(4)    |
| C(12)-C(13)-C(14)-C(15) | -3.0(4)   |
| N(4)-C(13)-C(14)-C(15)  | 174.6(3)  |
| C(13)-C(14)-C(15)-C(16) | 1.0(5)    |
| C(14)-C(15)-C(16)-C(17) | 1.2(5)    |
| C(15)-C(16)-C(17)-C(12) | -1.7(4)   |
| C(13)-C(12)-C(17)-C(16) | -0.1(4)   |
| C(11)-C(12)-C(17)-C(16) | 177.4(3)  |



|                       |           |
|-----------------------|-----------|
| C(2)-C(1)-N(1)-C(9)   | -0.1(4)   |
| C(4)-C(9)-N(1)-C(1)   | 0.6(4)    |
| C(8)-C(9)-N(1)-C(1)   | -179.4(2) |
| O(1)-C(10)-N(2)-N(3)  | -3.5(4)   |
| C(2)-C(10)-N(2)-N(3)  | 176.3(2)  |
| C(12)-C(11)-N(3)-N(2) | -179.8(2) |
| C(10)-N(2)-N(3)-C(11) | 178.7(2)  |
| C(14)-C(13)-N(4)-O(3) | 31.3(4)   |
| C(12)-C(13)-N(4)-O(3) | -151.1(3) |
| C(14)-C(13)-N(4)-O(2) | -145.1(2) |
| C(12)-C(13)-N(4)-O(2) | 32.5(4)   |

---



Table S8. Hydrogen bonds for NQ·H<sub>2</sub>O [Å and °].

| D-H...A              | d(D-H) | d(H...A) | d(D...A) | <(DHA) |
|----------------------|--------|----------|----------|--------|
| C(1)-H(1)...O(4)#1   | 0.95   | 2.33     | 3.276(3) | 170.9  |
| C(8)-H(8)...O(2)#2   | 0.95   | 2.46     | 3.352(4) | 156.6  |
| C(11)-H(11)...O(4)#1 | 0.95   | 2.52     | 3.323(3) | 142.2  |
| N(2)-H(2)...O(4)#1   | 0.88   | 2.02     | 2.884(3) | 165.4  |
| O(4)-H(4A)...N(1)#3  | 0.82   | 2.05     | 2.861(3) | 168.2  |
| O(4)-H(4B)...O(1)    | 0.82   | 2.03     | 2.830(3) | 164.7  |

Symmetry transformations used to generate equivalent atoms:

#1 -x+1,y+1/2,-z+3/2 #2 -x+1,-y+2,-z+1 #3 x,-y+3/2,z+1/2
